# Supplementary material for: Characterizing chromatin folding coordinate and landscape with deep learning
Source: PubMed Central journal article supplement (PMC7544120; doi:10.1371/journal.pcbi.1008262), 2020-09-28
Supplement: pcbi.1008262.s012.pdf [file pcbi.1008262.s012.pdf]

**Table S1.** Number of WT cells at various values of the folding coordinate.

| Folding coordinate | Cell count |
|--------------------|------------|
| -3.4               | 1          |
| -3.2               | 2          |
| -3.0               | 4          |
| -2.8               | 4          |
| -2.6               | 3          |
| -2.4               | 5          |
| -2.2               | 12         |
| -2.0               | 19         |
| -1.8               | 15         |
| -1.6               | 30         |
| -1.4               | 31         |
| -1.2               | 45         |
| -1.0               | 64         |
| -0.8               | 105        |
| -0.6               | 157        |
| -0.4               | 222        |
| -0.2               | 370        |
| 0.0                | 643        |
| 0.2                | 1014       |
| 0.4                | 1298       |
| 0.6                | 1591       |
| 0.8                | 1580       |
| 1.0                | 1162       |
| 1.2                | 908        |
| 1.4                | 766        |
| 1.6                | 547        |
| 1.8                | 402        |
| 2.0                | 236        |
| 2.2                | 159        |
| 2.4                | 106        |
| 2.6                | 66         |
| 2.8                | 33         |
| 3.0                | 20         |
| 3.2                | 4          |
| 3.4                | 4          |
| 3.6                | 1          |
| 3.8                | 2          |
