# Supplementary material for: Characterizing chromatin folding coordinate and landscape with deep learning
Source: PubMed Central journal article supplement (PMC7544120; doi:10.1371/journal.pcbi.1008262), 2020-09-28
Supplement: pcbi.1008262.s013.pdf [file pcbi.1008262.s013.pdf]

**Table S2.** Number of cohesin-depleted cells at various values of the folding coordinate.

| Folding coordinate | Cell count |
|--------------------|------------|
| -3.8               | 2          |
| -3.6               | 1          |
| -3.4               | 8          |
| -3.2               | 10         |
| -3.0               | 24         |
| -2.8               | 24         |
| -2.6               | 58         |
| -2.4               | 100        |
| -2.2               | 153        |
| -2.0               | 206        |
| -1.8               | 330        |
| -1.6               | 441        |
| -1.4               | 589        |
| -1.2               | 639        |
| -1.0               | 799        |
| -0.8               | 1061       |
| -0.6               | 1100       |
| -0.4               | 1119       |
| -0.2               | 1053       |
| 0.0                | 850        |
| 0.2                | 482        |
| 0.4                | 234        |
| 0.6                | 90         |
| 0.8                | 33         |
| 1.0                | 28         |
| 1.2                | 28         |
| 1.4                | 20         |
| 1.6                | 18         |
| 1.8                | 12         |
| 2.0                | 5          |
| 2.2                | 6          |
| 2.4                | 1          |
| 2.8                | 2          |
